# Supplementary material for: A theoretical and experimental study of the crystal structure of H2V3O8
Source: Royal Society of Chemistry journal article supplement (doi:10.1039/c5ra19665e), 2015-01-01
Supplement: c5ra19665e1.pdf [file c5ra19665e1.pdf]

# A theoretical and experimental study of the crystal structure of $\text{H}_2\text{V}_3\text{O}_8$ <sup>†</sup>

Yoann Mettan,<sup>\*a</sup> Riccarda Caputo,<sup>\*b</sup> and Tapan Chatterji<sup>c</sup>

## 1 Supplementary Information

The crystal structure of  $\text{H}_2\text{V}_3\text{O}_8$  was described<sup>1</sup> as being characterized by a nearly two-dimensional framework of  $\text{V}_3\text{O}_8$  layers, comprised of three kinds of  $[\text{VO}_n]$  polyhedra: two  $[\text{VO}_6]$  octahedra and one  $[\text{VO}_5]$  trigonal bipyramid. Units of edge-sharing octahedra pile up along the crystallographic **b**-axis and are connected by two edge-sharing trigonal bipyramids forming  $\text{V}_3\text{O}_8$  layers in the *ab*-plane and stacked along the **b**-axis.

As the square pyramid and the trigonal bipyramid are closely related by the Berri-pseudo rotation, some authors may refer to this unit as trigonal bipyramid.

The electron diffraction patterns indicate that the  $\text{H}_2\text{V}_3\text{O}_8$  fibers elongate along the **b**-axis.

A cut through the V-O bonds at 2.15 Å shows that the face-sharing octahedral coordination of vanadium atoms reduces to corner-sharing square pyramidal coordination, because the V(1)-O(1) bond, 2.180 Å, displaced along the **b**-direction, is longer than the other five bonds. Accordingly, the  $\text{V}_3\text{O}_8$  framework can be described entirely by trigonal bipyramids,  $[\text{VO}_5]$ , which are alternatively corner- and edge-sharing in the (*ac*)-plane.

$\text{H}_2\text{V}_3\text{O}_8$  and  $\text{V}_3\text{O}_7 \cdot \text{H}_2\text{O}$  are likewise reported in literature to indicate the same compound, because of a lack of knowledge about the exact location of the hydrogen atoms in the lattice. A close look at the vanadium coordination in the monoclinic structure of  $\text{V}_3\text{O}_7$ , space group  $C2/c$ , proposed by Waltersson<sup>2</sup>, suggests that it does not share the identical structural features of the orthorhombic structure suggested by Oka<sup>1</sup> for  $\text{H}_2\text{V}_3\text{O}_8$ . In the monoclinic heptaoxide  $\text{V}_3\text{O}_7$ , chains of edge-sharing square-based pyramids,  $[\text{VO}_5]$ , alternate by corner-sharing with the octahedra  $[\text{VO}_6]$  along the crystallographic **c**-direction. The edge-sharing octahedra,  $[\text{VO}_6]$ , displaced on the (*ac*)-plane are corner-sharing along the crystallographic **b**-direction.

The Figure 1 shows a topview of the monoclinic  $\text{V}_3\text{O}_7$ <sup>2</sup> and the

orthorhombic  $\text{H}_2\text{V}_3\text{O}_8$ <sup>1</sup> structures, as they are reported in the references.

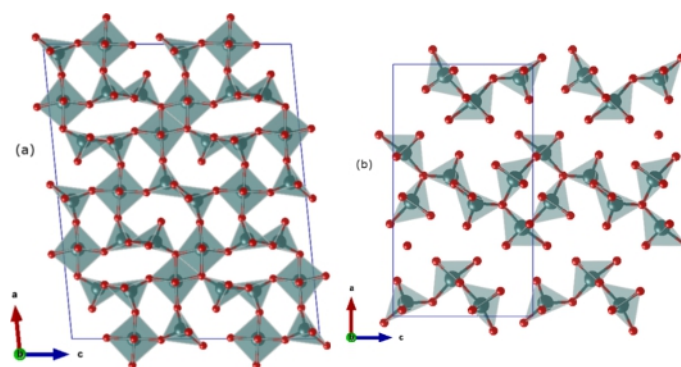

Fig. 1: (a) A top-view of the unit cell of the monoclinic structure of  $\text{V}_3\text{O}_7$ <sup>2</sup>, symmetry space group  $C2/m$ . The average bond lengths of V-O bonds in  $[\text{VO}_6]$  are 1.947 Å and 1.939 Å (distortion index of 0.056 in bond length); and in  $[\text{VO}_5]$  are 1.813 Å and 1.825 Å (distortion index of 0.071 and 0.075 in bond length). (b) A topview of the  $1 \times 1 \times 2$  cell of the orthorhombic  $Pnma$  structure of  $\text{H}_2\text{V}_3\text{O}_8$ <sup>1</sup>. By cutting through the V-O bond lengths at 2.15 Å, the edge-sharing octahedra<sup>1</sup>, which pile up along the **b**-direction, become corner-sharing square pyramids with the average bond lengths of 1.901 Å (distortion index of 0.062 in bond length) and 1.893 Å (distortion index of 0.064 in bond length). The average bond lengths of V-O bonds in the other  $[\text{VO}_5]$ , corner-sharing trigonal bipyramids are 1.9001 Å and 1.830 Å (distortion index of 0.062 and 0.057 in bond length). The V(1)-O(3) bond length is the largest, 2.072 Å, while the V(2)-O(6) is 2.056 Å. The O(6) is the oxygen atom, which in our crystal structure prediction is bound to hydrogen atoms. The polyhedra of coordination of vanadium atoms are reported.

At DFT-D level of theory, the geometry optimization of the monoclinic structure of  $\text{V}_3\text{O}_7$ <sup>2</sup> resulted still monoclinic, after relaxing the atomic positions and the lattice parameters, but represented in the symmetry space group  $C2/m$  (IT No 15), which differs from the  $C2/c$  symmetry space group by the mirror plane. The number of formula units in the optimized structure is accordingly half of the reference structure. In the optimized structure the (1 0 0) plane passes through the six-fold coordinated vanadium atoms, which octahedra are alternatively corner- and edge-sharing units. In Table S.1 the structure data of the optimized monoclinic structure of  $\text{V}_3\text{O}_7$ , symmetry space group  $C2/m$  are reported.

The ribbon-like morphology of the  $\text{V}_3\text{O}_8$  framework<sup>1</sup> is characterized by the corner-sharing units  $[\text{VO}_5]$ , aligned on the (*ac*)-plane and interconnected perpendicularly, along the **b**-direction

<sup>a</sup> Belenos Clean Power Holding Ltd, c/o Renata AG, CH-4452 Itigen, Switzerland; E-mail: yoann.mettan@belenoscleanpower.com

<sup>b</sup> ETH Zürich, Swiss Federal Institute of Technology, Department of Chemistry and Applied Biosciences, Institute of Inorganic Chemistry, Vladimir-Prelog-Weg 1, 8093 Zürich, Switzerland; E-mail: riccarda.caputo@inorg.chem.ethz.ch

<sup>c</sup> Institute Lau-Langevin, 71 Avenue des Martyrs, CS 20156 - 38042 Grenoble, Cedex 9, France

<sup>†</sup> Electronic Supplementary Information (ESI) available: [details of any supplementary information available should be included here]. See DOI: 10.1039/b000000x/

Table 1: The atomic positions of the monoclinic structure of  $V_3O_7$ , space group  $C2/m$  (IT No 12), optimized at DFT-D level. The lattice parameters are:  $a = 18.626 \text{ \AA}$ ,  $b = 3.622 \text{ \AA}$ ,  $c = 13.719 \text{ \AA}$ ,  $\beta = 126.135$  degrees.

| species | x      | y   | z      | site |
|---------|--------|-----|--------|------|
| V(1)    | 0      | 1/2 | 0      | 2b   |
| V(2)    | 0.5035 | 0   | 0.3840 | 4i   |
| V(3)    | 0.3358 | 0   | 0.0653 | 4i   |
| V(4)    | 0.6614 | 0   | 0.3290 | 4i   |
| V(5)    | 0.2992 | 0   | 0.3400 | 4i   |
| O(1)    | 0.0049 | 0   | 0.3894 | 4i   |
| O(2)    | 0      | 0   | 0      | 2a   |
| O(3)    | 0.7986 | 0   | 0.0573 | 4i   |
| O(4)    | 0.2008 | 0   | 0.3608 | 4i   |
| O(5)    | 0.2168 | 0   | 0.6315 | 4i   |
| O(6)    | 0.3865 | 0   | 0.5937 | 4i   |
| O(7)    | 0.3908 | 0   | 0.0029 | 4i   |
| O(8)    | 0.2608 | 0   | 0.1979 | 4i   |
| O(9)    | 0.5785 | 0   | 0.1813 | 4i   |
| O(10)   | 0.4251 | 0   | 0.2213 | 4i   |
| O(11)   | 0.4172 | 0   | 0.4250 | 4i   |

to the edge-sharing  $[VO_5]$ . If the structure of  $V_3O_7$  converted into the  $H_2V_3O_8$  structure by  $H_2O$  absorption, the reaction  $V_3O_7 + H_2O \rightarrow H_2V_3O_8$  would involve the formation of a new V-O bond, unless to consider the water molecules simply coordinated into the  $V_3O_7$  lattice by polarization interactions. In the latter case the V-O skeletons of  $V_3O_7$  and  $V_3O_8$  should perfectly match, unless water absorption can induce lattice distortion, besides eventually a volume expansion, but they do not. In addition, there is no direct group-subgroup relationship neither between the experimental ( $C2/c$ ) nor the theoretically optimized  $V_3O_7$  model ( $C2/m$ ) between the monoclinic heptoxide,  $V_3O_7$  and the orthorhombic framework of  $V_3O_8$ <sup>1</sup>. Moreover, there are clear distinctions in terms of connectivities between the polyhedra in  $V_3O_7$  and  $V_3O_8$  framework<sup>1</sup>. This means that there cannot be a continuous second order kind of transition on adding water to  $V_3O_7$  to form  $H_2V_3O_8$ . On the other hand, lattice distortions induced upon water absorption have to be sufficient to turn into orthogonal the monoclinic lattice of  $V_3O_7$  and accordingly change the edge-sharing polyhedra  $[VO_6]$  in  $V_3O_7$  into corner-sharing square pyramids,  $[VO_5]$ , being the octahedra  $[VO_6]$  absent in  $V_3O_8$  network. Our calculations of the absorption of  $H_2O$  in the monoclinic heptoxide,  $V_3O_7$ , showed that it is an exothermic process, of which the enthalpy of absorption to form the orthorhombic  $H_2V_3O_8$  is  $-68.07 \text{ kJ/mol}$  of  $H_2O$  absorbed, calculated at DFT-D level and at (P, T) equal to zero, without accounting in for the zero-point energy and the thermal contributions. Although a detail understanding of water absorption in  $V_3O_7$  requires a study on its own, our molecular dynamics calculations (NPT ensemble, P = 1 atm, T = 300 K) of the stoichiometric amount of  $H_2O$  in  $V_3O_7$  to have formally  $H_2V_3O_8$ , revealed an interesting chemistry. In fact, the O-H bonds in  $H_2O$  split into OH, with the oxygen atom forming the new V-O bonds and H atoms bound to the oxygen atoms of the  $[VO_6]$  octahedra. Accordingly, the MD calculations suggest the formation of hydroxyl group, which hydrogen atoms interact via hydrogen bonds.

In Figure 2 is shown a snapshot of a trajectory of the molecular dynamics of the system  $V_3O_7$  (monoclinic structure) and the stoi-

chiometric amount of water to have the formulation  $H_2V_3O_8$ . For comparison the monoclinic structure of  $V_3O_7$  optimized at DFT-D level is reported. Interestingly, by  $H_2O$  absorption the lattice turned almost orthogonal. In fact, the  $\beta$  angle in  $V_3O_7$  changed from 126.14 degrees to 91.10 degrees. The hydroxyl group and hydrogen bonds are formed.

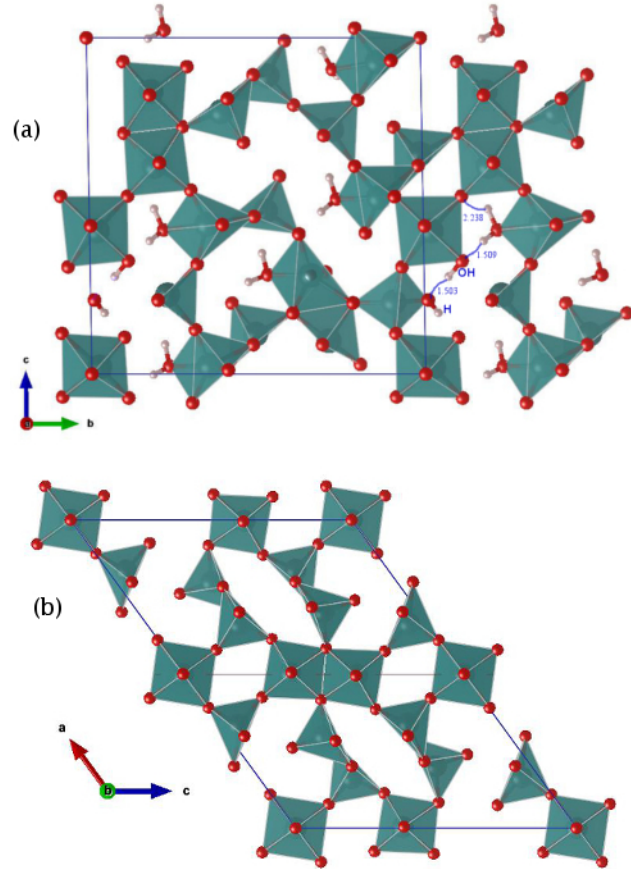

Fig. 2: (a) A snapshot (top-view) of the room-temperature molecular dynamics of the system  $V_3O_7 + H_2O$ . The O-H distances are in  $\text{\AA}$ . (b) A top-view of the monoclinic structure,  $C2/m$ , of  $V_3O_7$  as optimized at DFT-D level. Representing colours: vanadium, green with the polyhedra of coordination; oxygen, red; hydrogen, white.

A Scanning Electron Micrograph (SEM) of the as-synthesised  $H_2V_3O_8$  is shown in Figure 3.

The XRD pattern of the residual of the TG analysis at 690 K is reported in Figure 4. Several phases are present, among which the monoclinic structure of  $V_3O_7$ .

## References

- 1 Y. Oka, T. Yao and N. Yamamoto, *J. Solid State Chem.*, 1990, **89**, 372–377.
- 2 K. Waltersson, B. Forslund, K. Wilhelmi, S. Andersson and J. Galy, *Acta Cryst. B*, 1974, **30**, 2644.

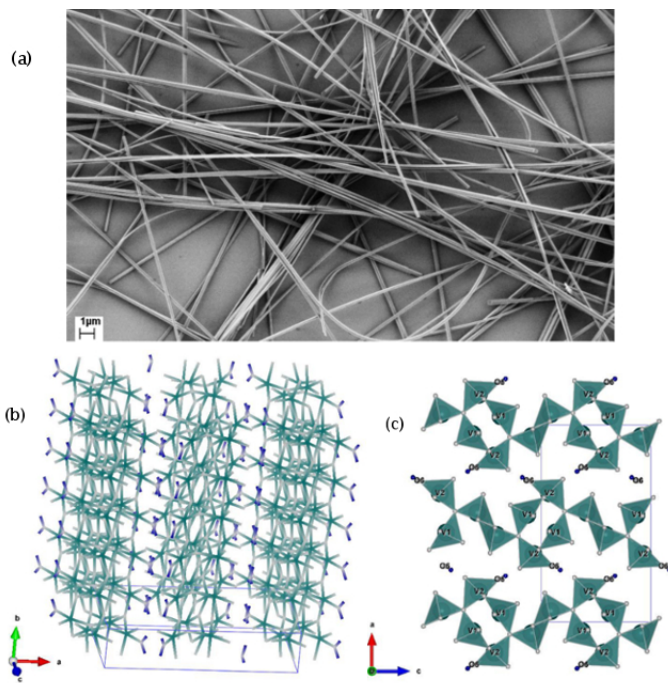

Fig. 3: (a) A SEM image of the bunched  $\text{H}_2\text{V}_3\text{O}_8$  nanowires. (b) A 3D-view, in the wireframe representation, of  $\text{H}_2\text{V}_3\text{O}_8$  (structure 1) showing the displacement of the wires along the crystallographic **b**-direction. (c) a top-view with the polyhedra of coordination of vanadium atoms cut through the V-O bond length of 2.30 Å. Representing colours: hydrogen, blue; vanadium, green; oxygen, grey.

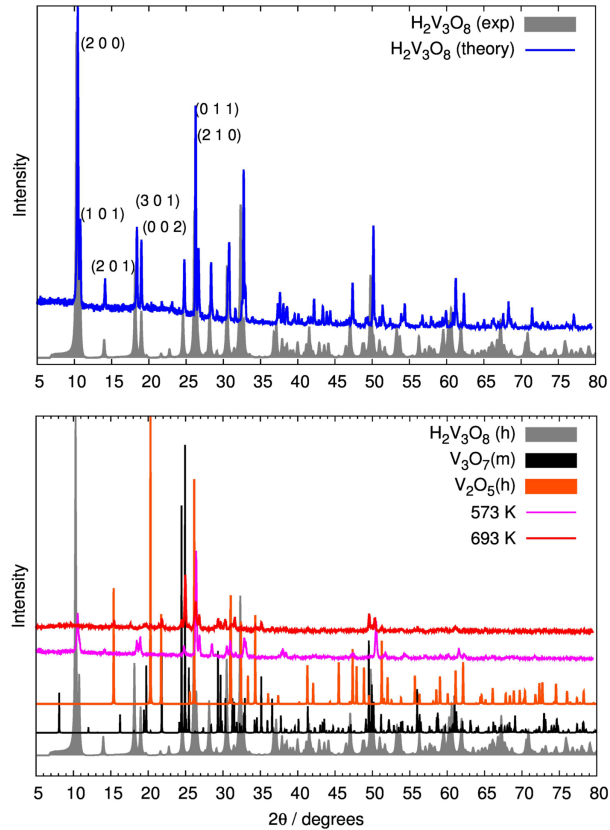

Fig. 4: A XRD pattern of the residual of the TG analysis at 690 K.
